# Supplementary material for: Endogenous IFN-β signaling exerts anti-inflammatory actions in experimentally induced focal cerebral ischemia
Source: Springer Nature journal article supplement (doi:10.1186/s12974-015-0427-0), 2015-11-18
Supplement: MOESM1 [file 9768914]

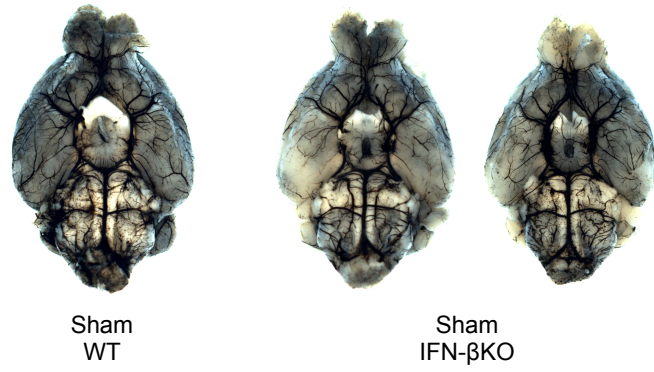

**Additional file 1\_Middle cerebral artery configuration.** Configuration of the middle cerebral artery in WT (right) and IFN- $\beta$ KO (left) mice, upon perfusion with a gelatinous carbon black solution. Representative photographs.
