# Supplementary material for: Endogenous IFN-β signaling exerts anti-inflammatory actions in experimentally induced focal cerebral ischemia
Source: Springer Nature journal article supplement (doi:10.1186/s12974-015-0427-0), 2015-11-18
Supplement: MOESM2 [file 9768914]

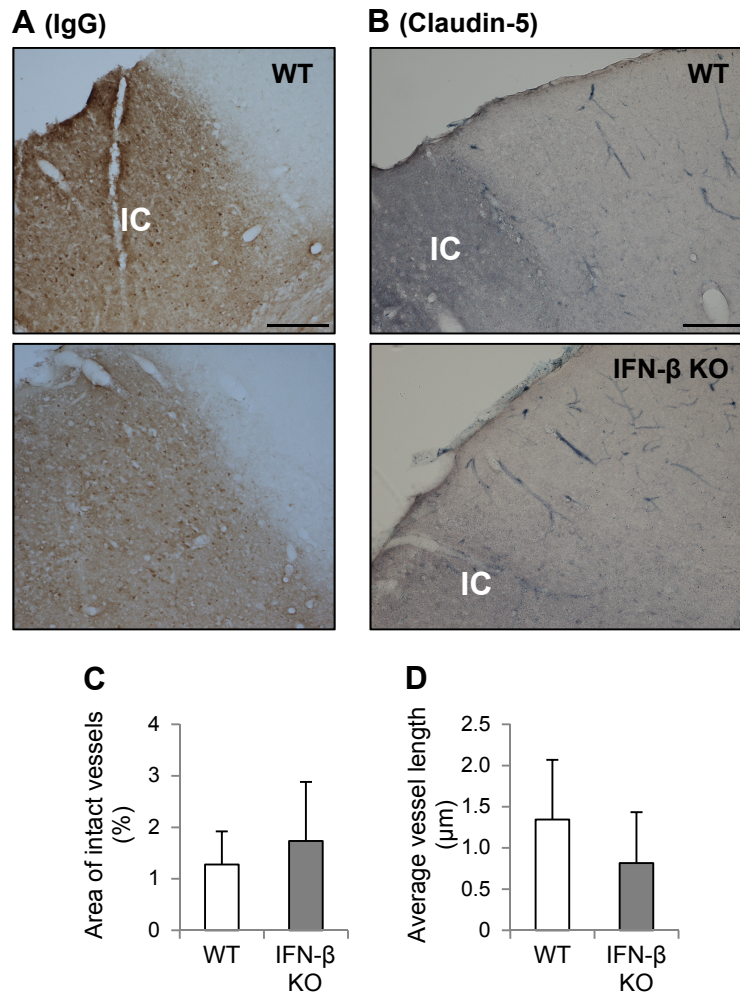

**Additional file 2\_Similar IgG and claudin-5 signals in WT and IFN-βKO brains 2 days after tMCAo.** **a** Image of the IgG-related signal observed in coronal brain slices, 2 days after tMCAo, showing extravasation of IgG in and around the infarct area, in WT and IFN-βKO mice, as indicated in the figure. *IC* infarct core. Scale bar, 200 μm. **b** Representative image of claudin-5<sup>+</sup> vessels in the peri-infarct area. **c** The bar graph shows the percentage of intact vessels covering the peri-infarct region (1 mm<sup>2</sup>) in each of the genotype groups ( $n=5$ ,  $p=0.46$ , Student's *t* test). **d** Graph denoting the average length of vessels in the peri-infarct region in WT and IFN-βKO mice ( $n=5$ ,  $p=0.25$ , Student's *t* test).
