# Supplementary material for: Endogenous IFN-β signaling exerts anti-inflammatory actions in experimentally induced focal cerebral ischemia
Source: Springer Nature journal article supplement (doi:10.1186/s12974-015-0427-0), 2015-11-18
Supplement: MOESM3 [file 12974_2015_427_MOESM3_ESM.pdf]

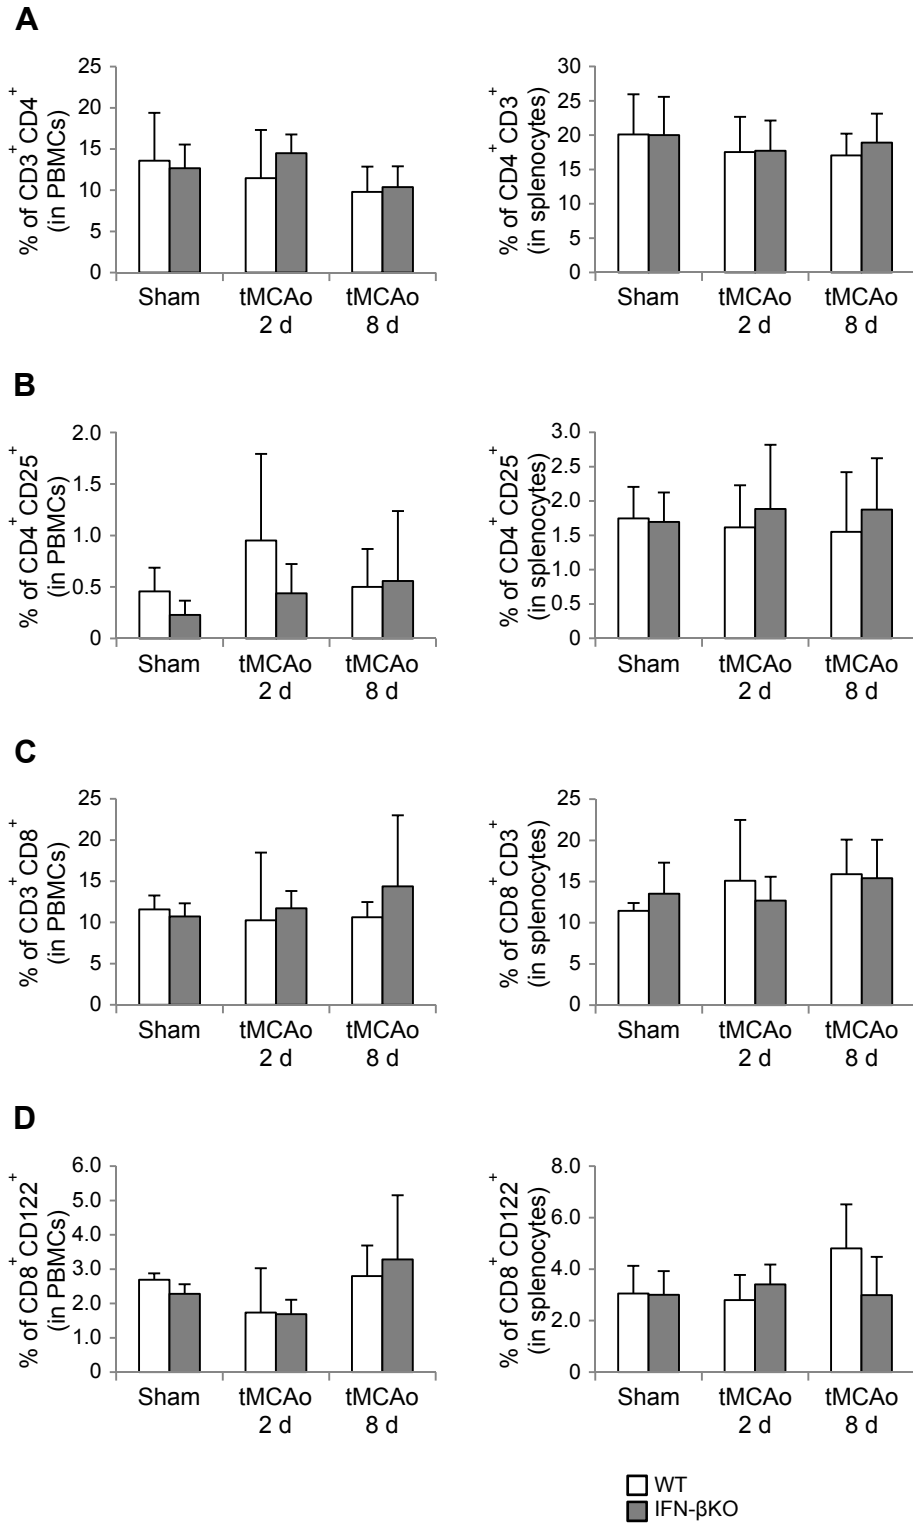

**Additional file 3\_Characterization of different populations of T lymphocytes in the blood and spleens of WT and IFN-βKO mice during the first week post-surgery. a** CD3<sup>+</sup>CD4<sup>+</sup> (T<sub>h</sub> cells). **b** CD4<sup>+</sup>CD25<sup>+</sup> (T<sub>reg</sub> cells). **c** CD3<sup>+</sup>CD8<sup>+</sup> (T<sub>C</sub> cells). **d** CD8<sup>+</sup>CD122<sup>+</sup> (T<sub>reg</sub>). **a-b** Left panel PBMCs. Right panel splenocytes. We present the results as percentage of total cells analyzed and as mean ± SD.
