# Supplementary material for: Endogenous IFN-β signaling exerts anti-inflammatory actions in experimentally induced focal cerebral ischemia
Source: Springer Nature journal article supplement (doi:10.1186/s12974-015-0427-0), 2015-11-18
Supplement: MOESM4 [file 9768914]

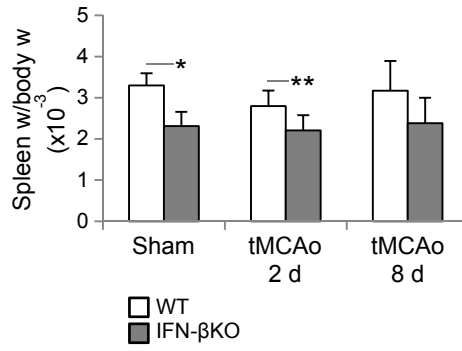

**Additional file 4\_Complete profile of WT and IFN-βKO mice spleen weight across conditions.** Spleen weight normalized to body weight in sham-operated mice ( $n=4$  for each genotype), 2 days after tMCAo (WT,  $n=9$ ; IFN-βKO,  $n=11$ ) and 8 days after tMCAo (WT,  $n=7$ ; IFN-βKO,  $n=8$ ). \* $p<0.05$  and \*\* $p<0.01$  (Bonferroni correction)
