# Supplementary material for: Endogenous IFN-β signaling exerts anti-inflammatory actions in experimentally induced focal cerebral ischemia
Source: Springer Nature journal article supplement (doi:10.1186/s12974-015-0427-0), 2015-11-18
Supplement: MOESM5 [file 9768914]

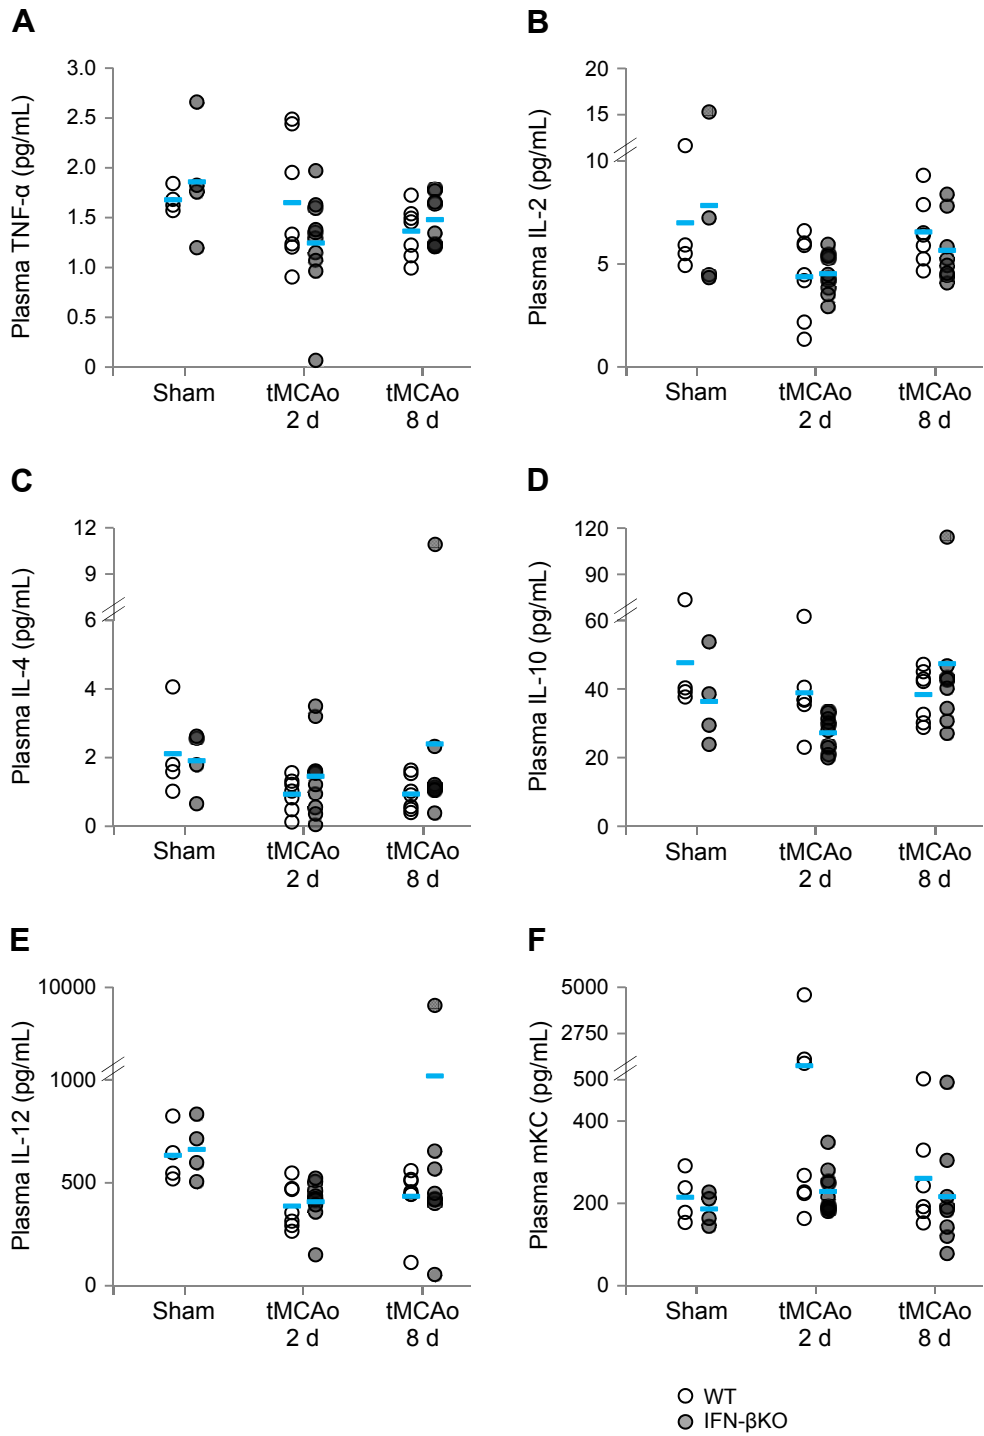

**Additional file 5\_Expression of Th1 and Th2 cytokines in the blood plasma of WT and IFN- $\beta$ KO mice during the first week post-surgery.** a-d Plasma IFN- $\gamma$ , IL-2, IL-4, IL-10, IL-12, mKC and TNF- $\alpha$  protein concentrations (pg/mL), respectively. We present individual data points and the mean (*blue dash*).
